# Supplementary figures and images for: Characterization of Perinatal Stem Cell Spheroids for the Development of Cell Therapy Strategy
Source: MDPI journal article supplement (doi:10.3390/bioengineering10020189), 2023-02-02

a)

### AECs

CD34

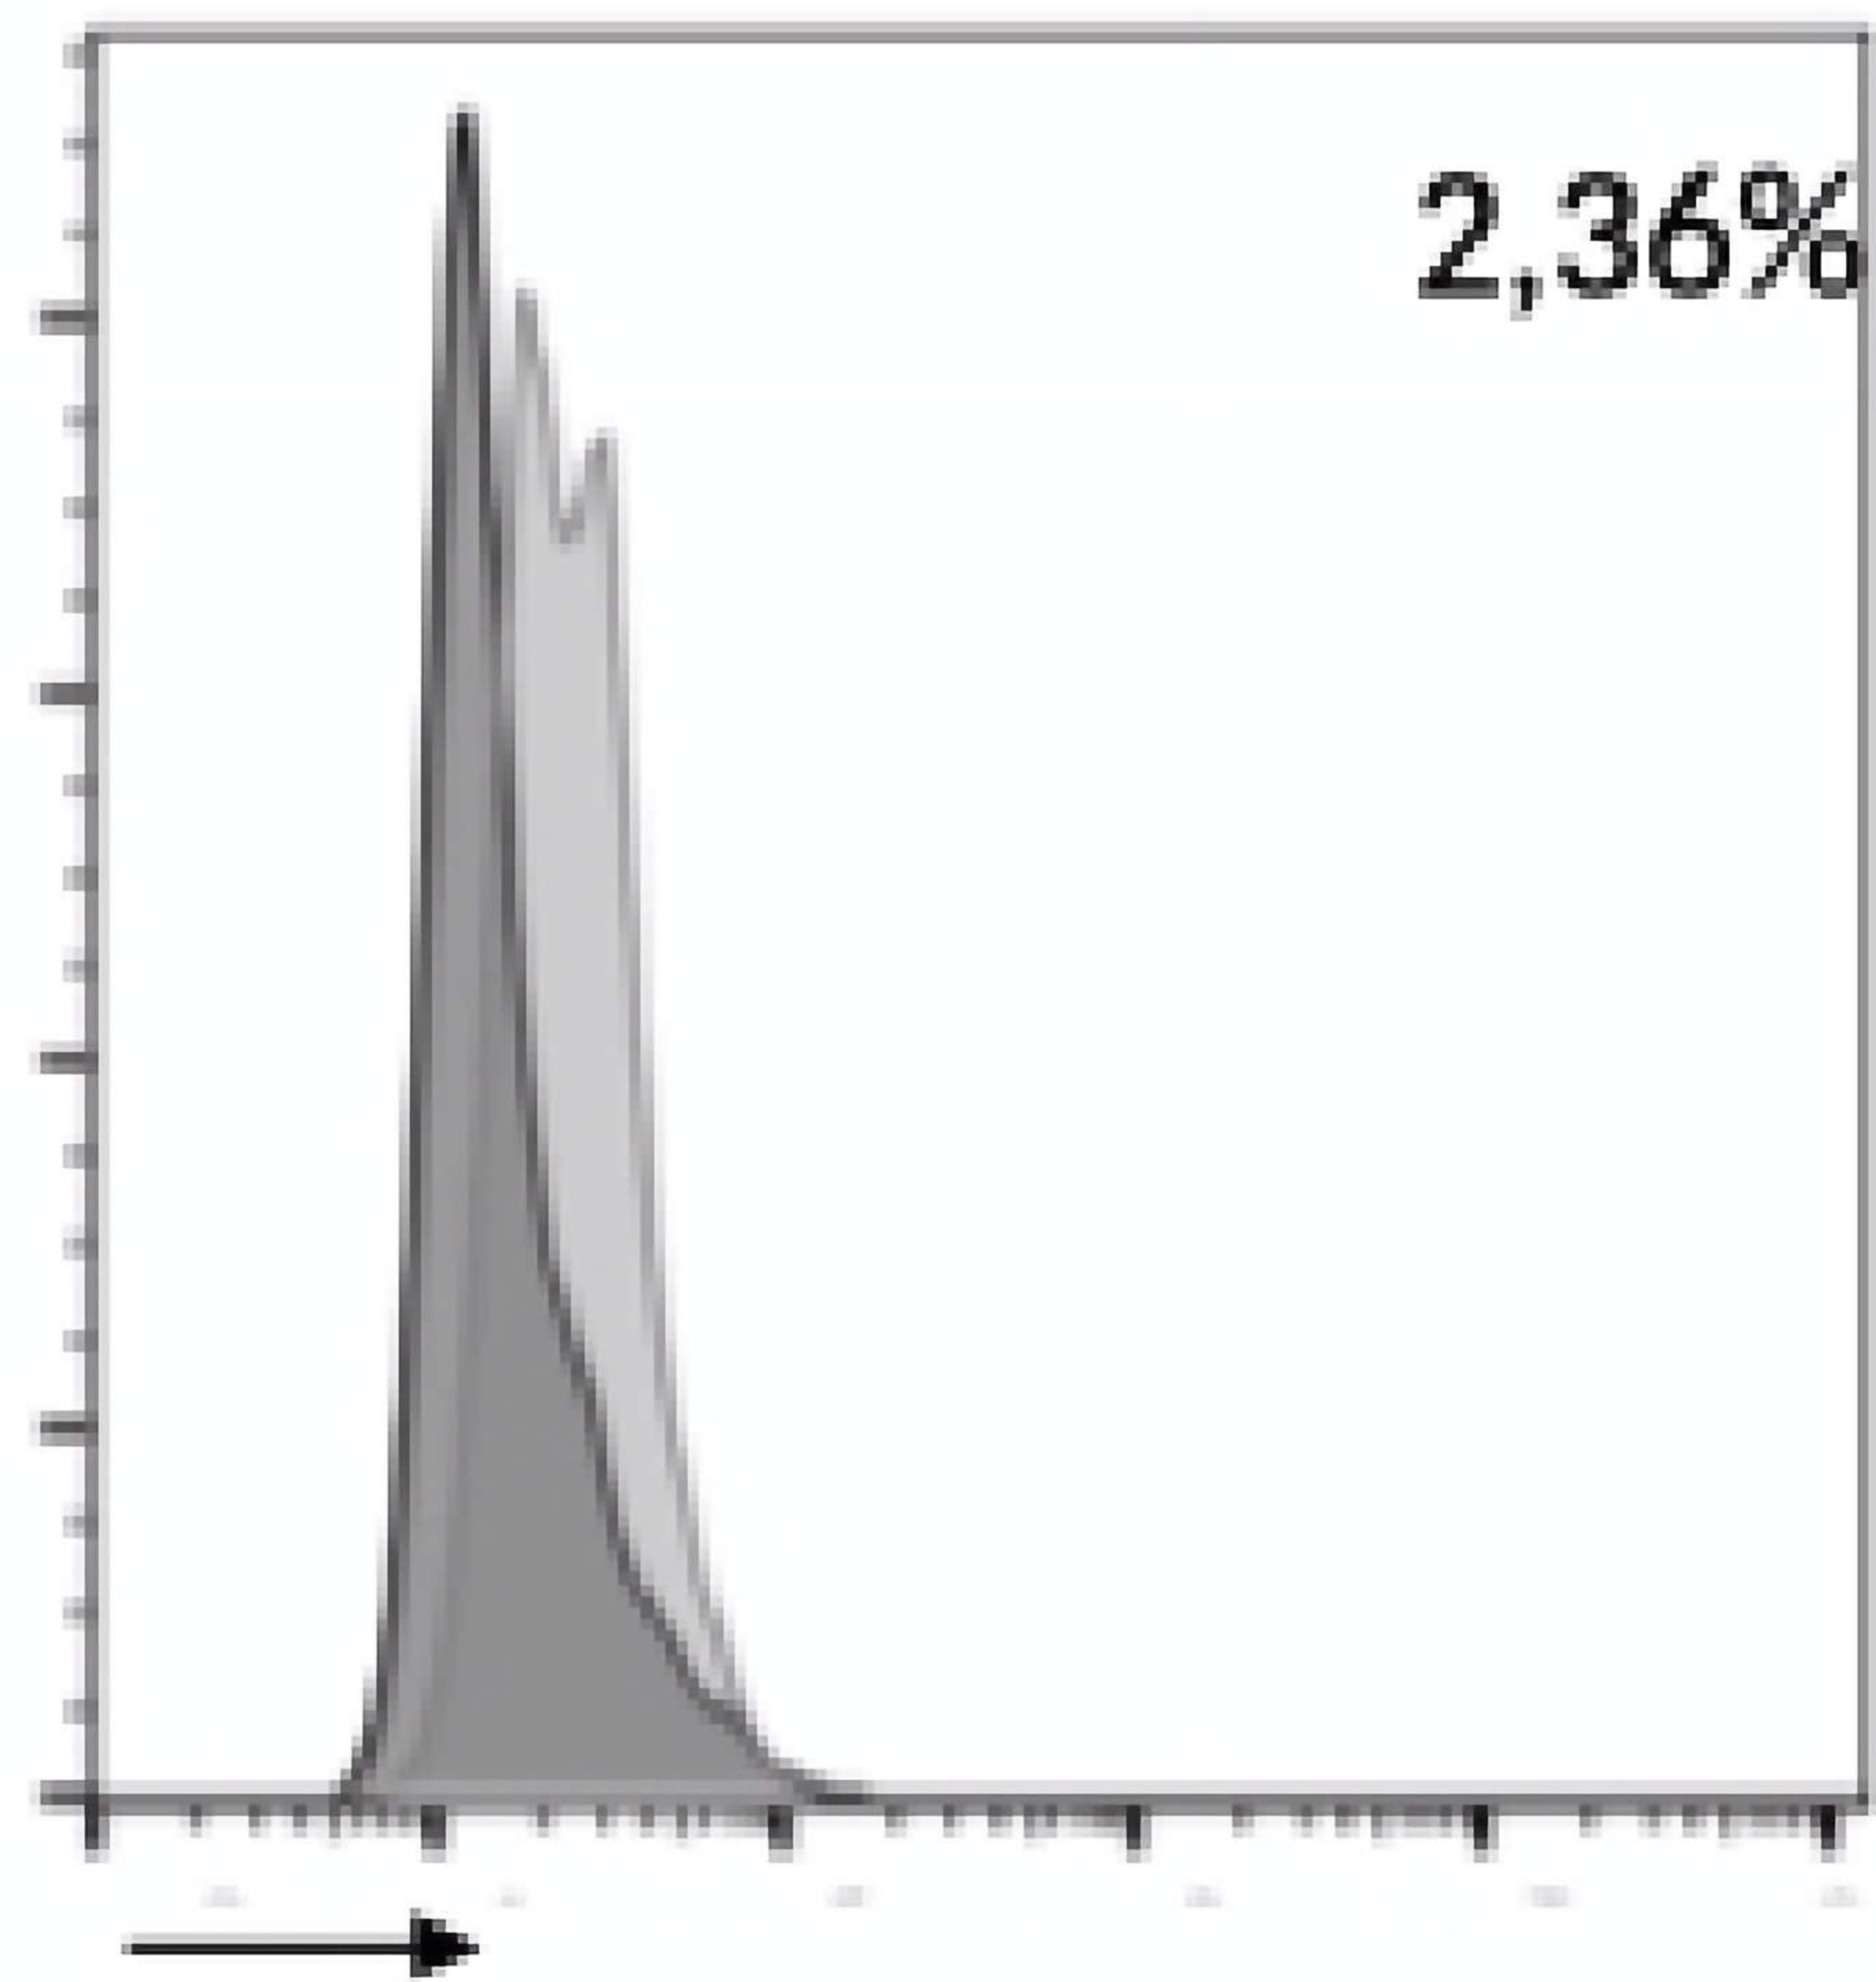

CD45

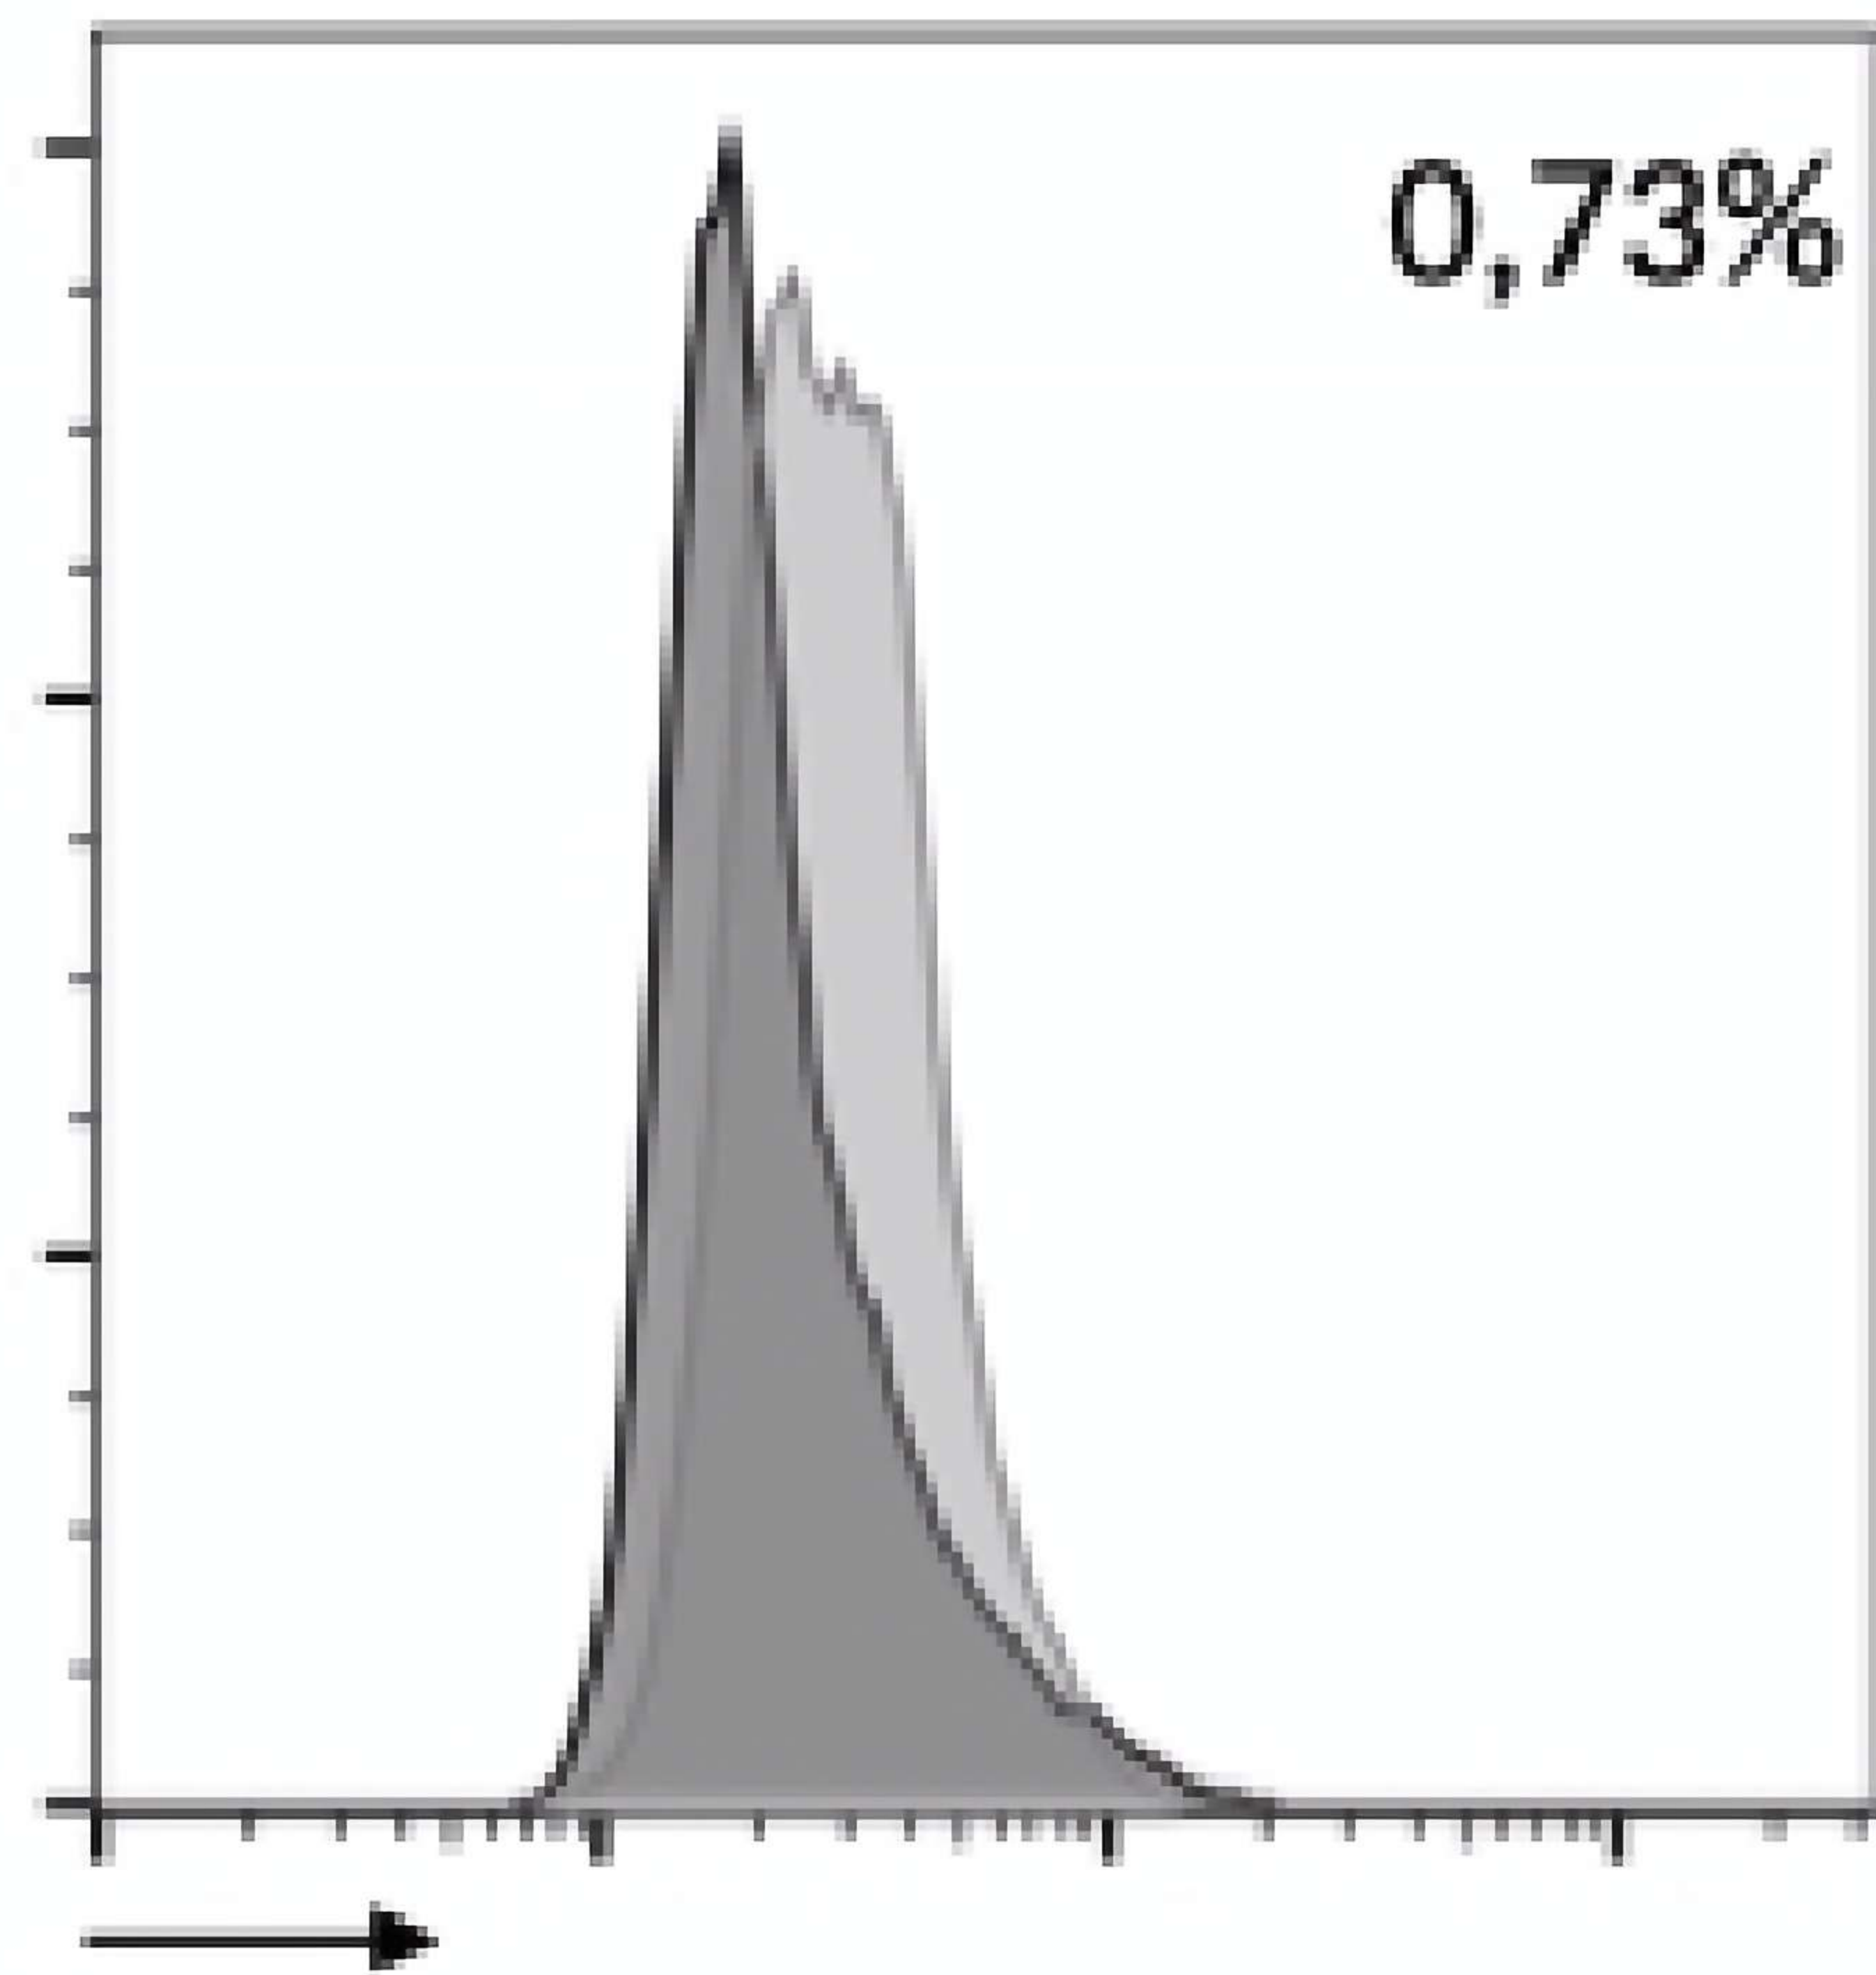

CD14

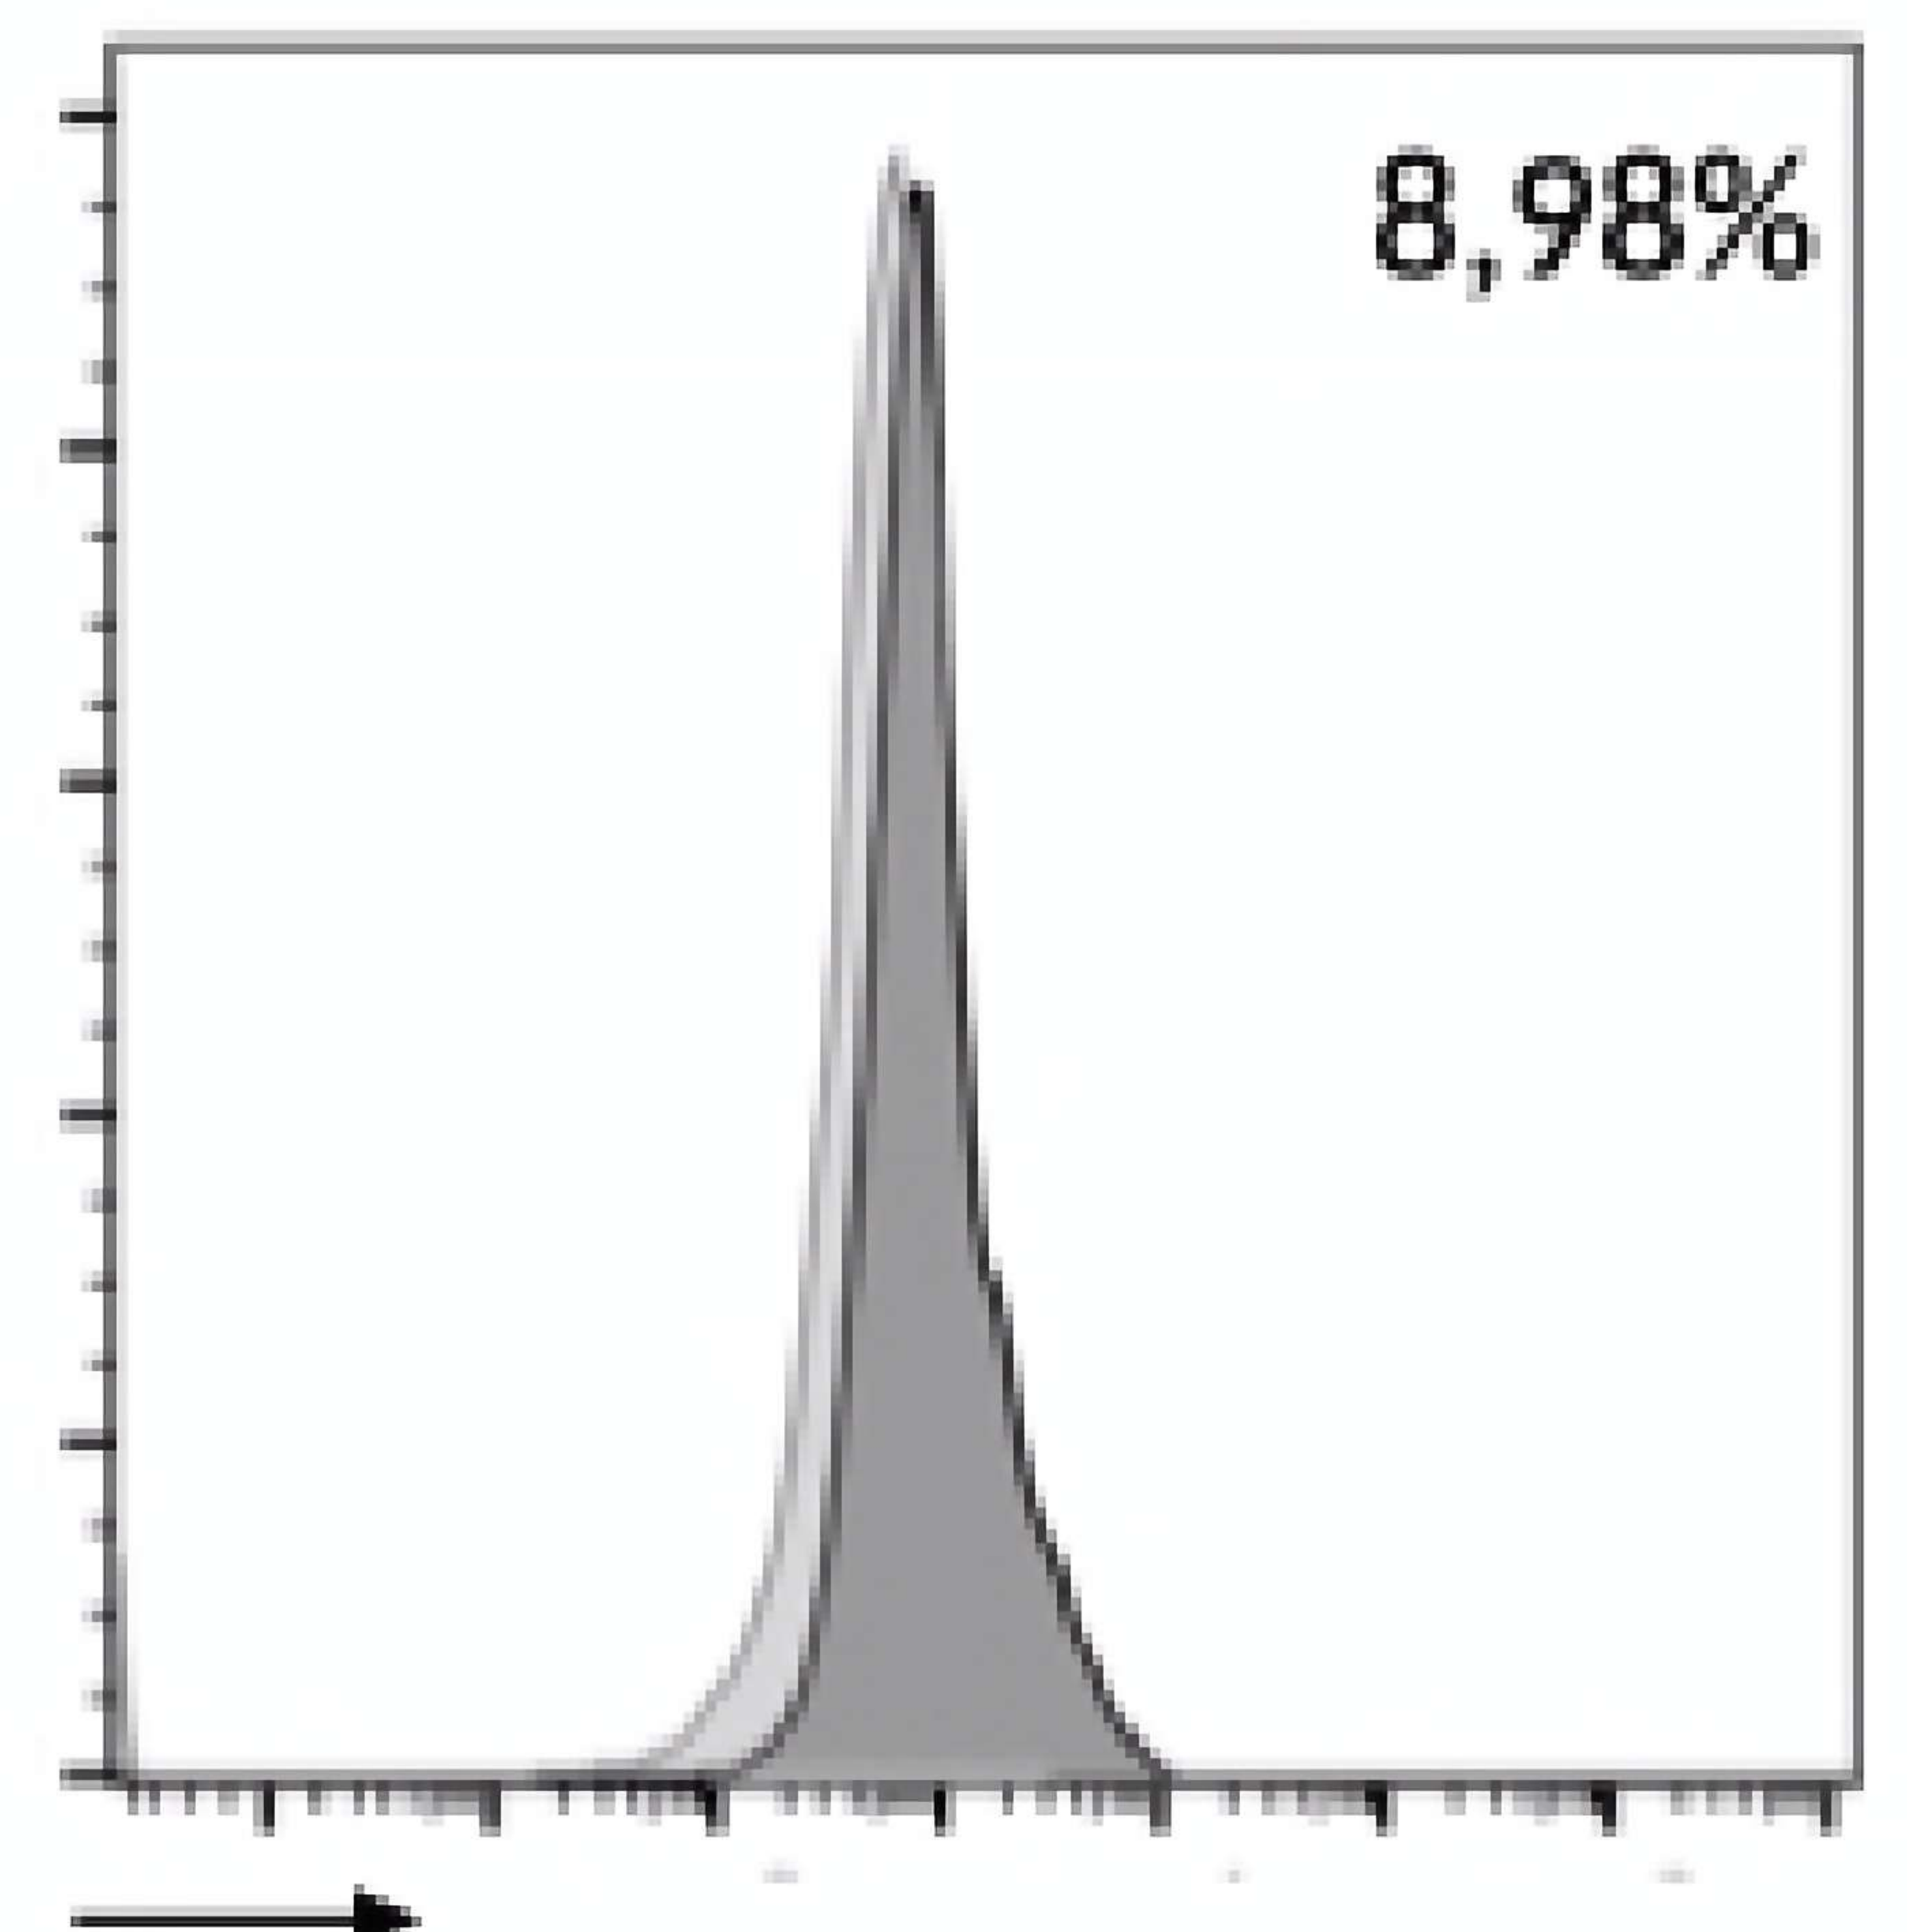

b)

### WJ-MSCs

CD34

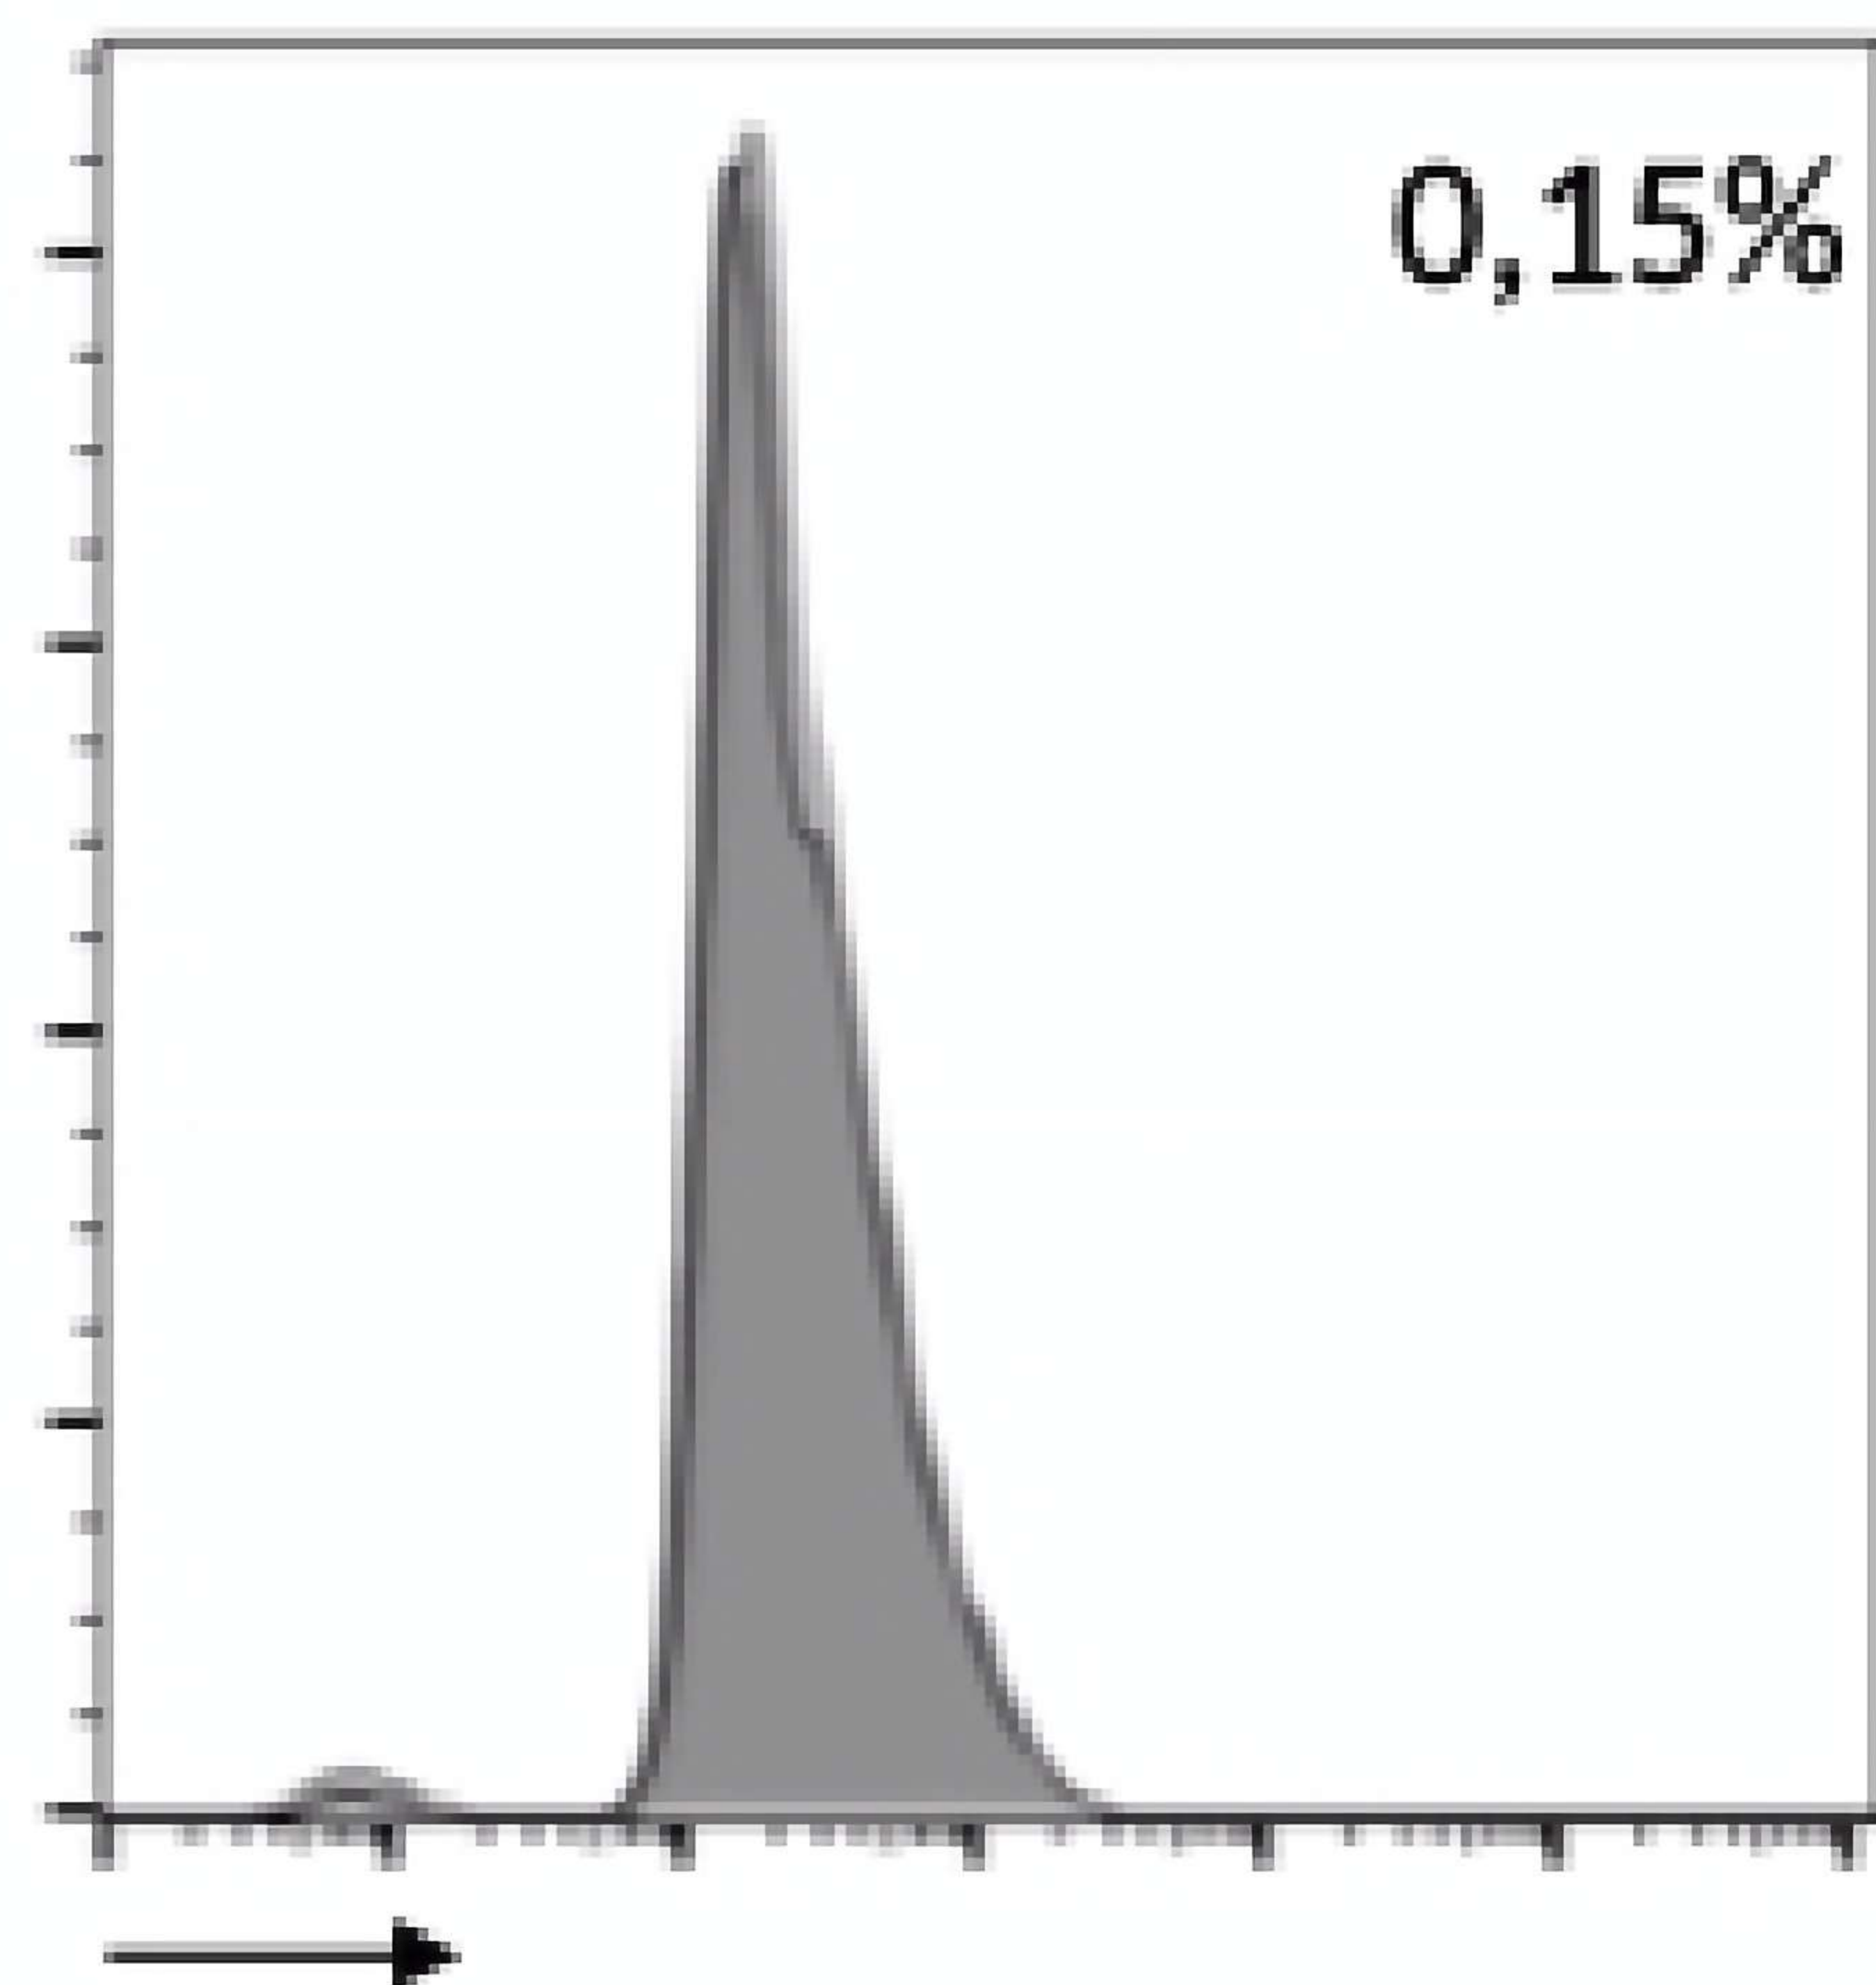

CD45

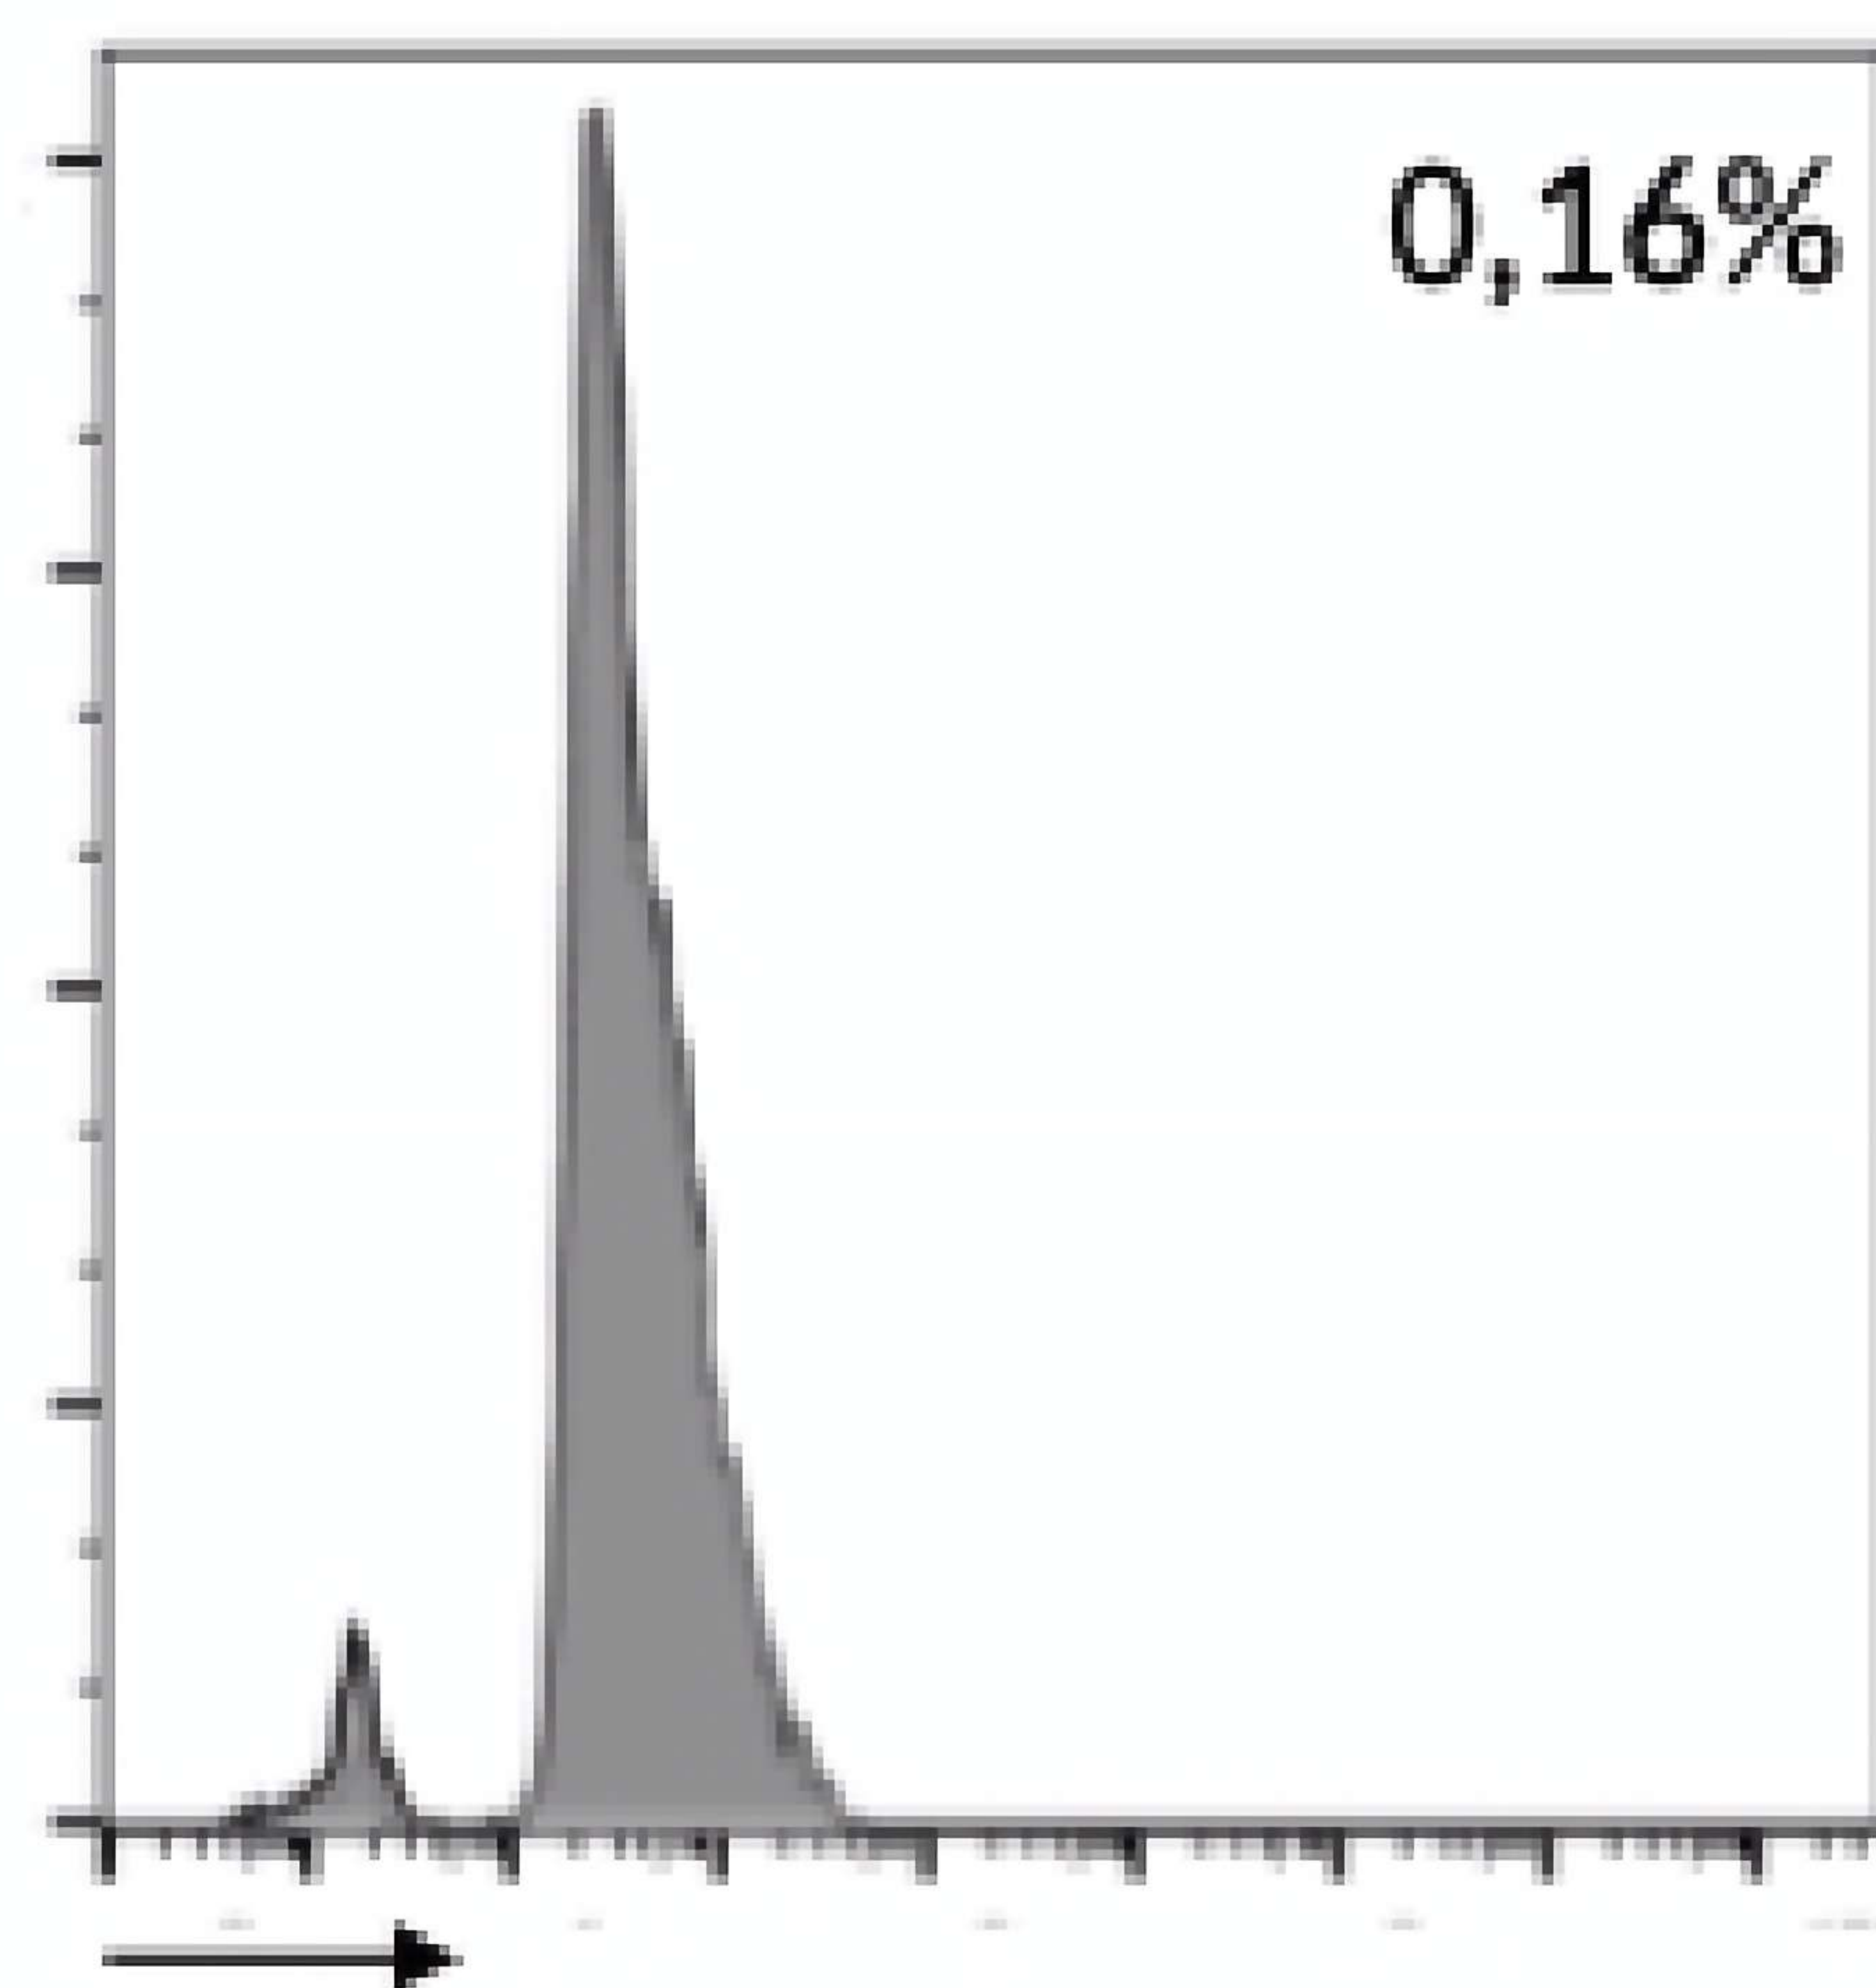

CD14

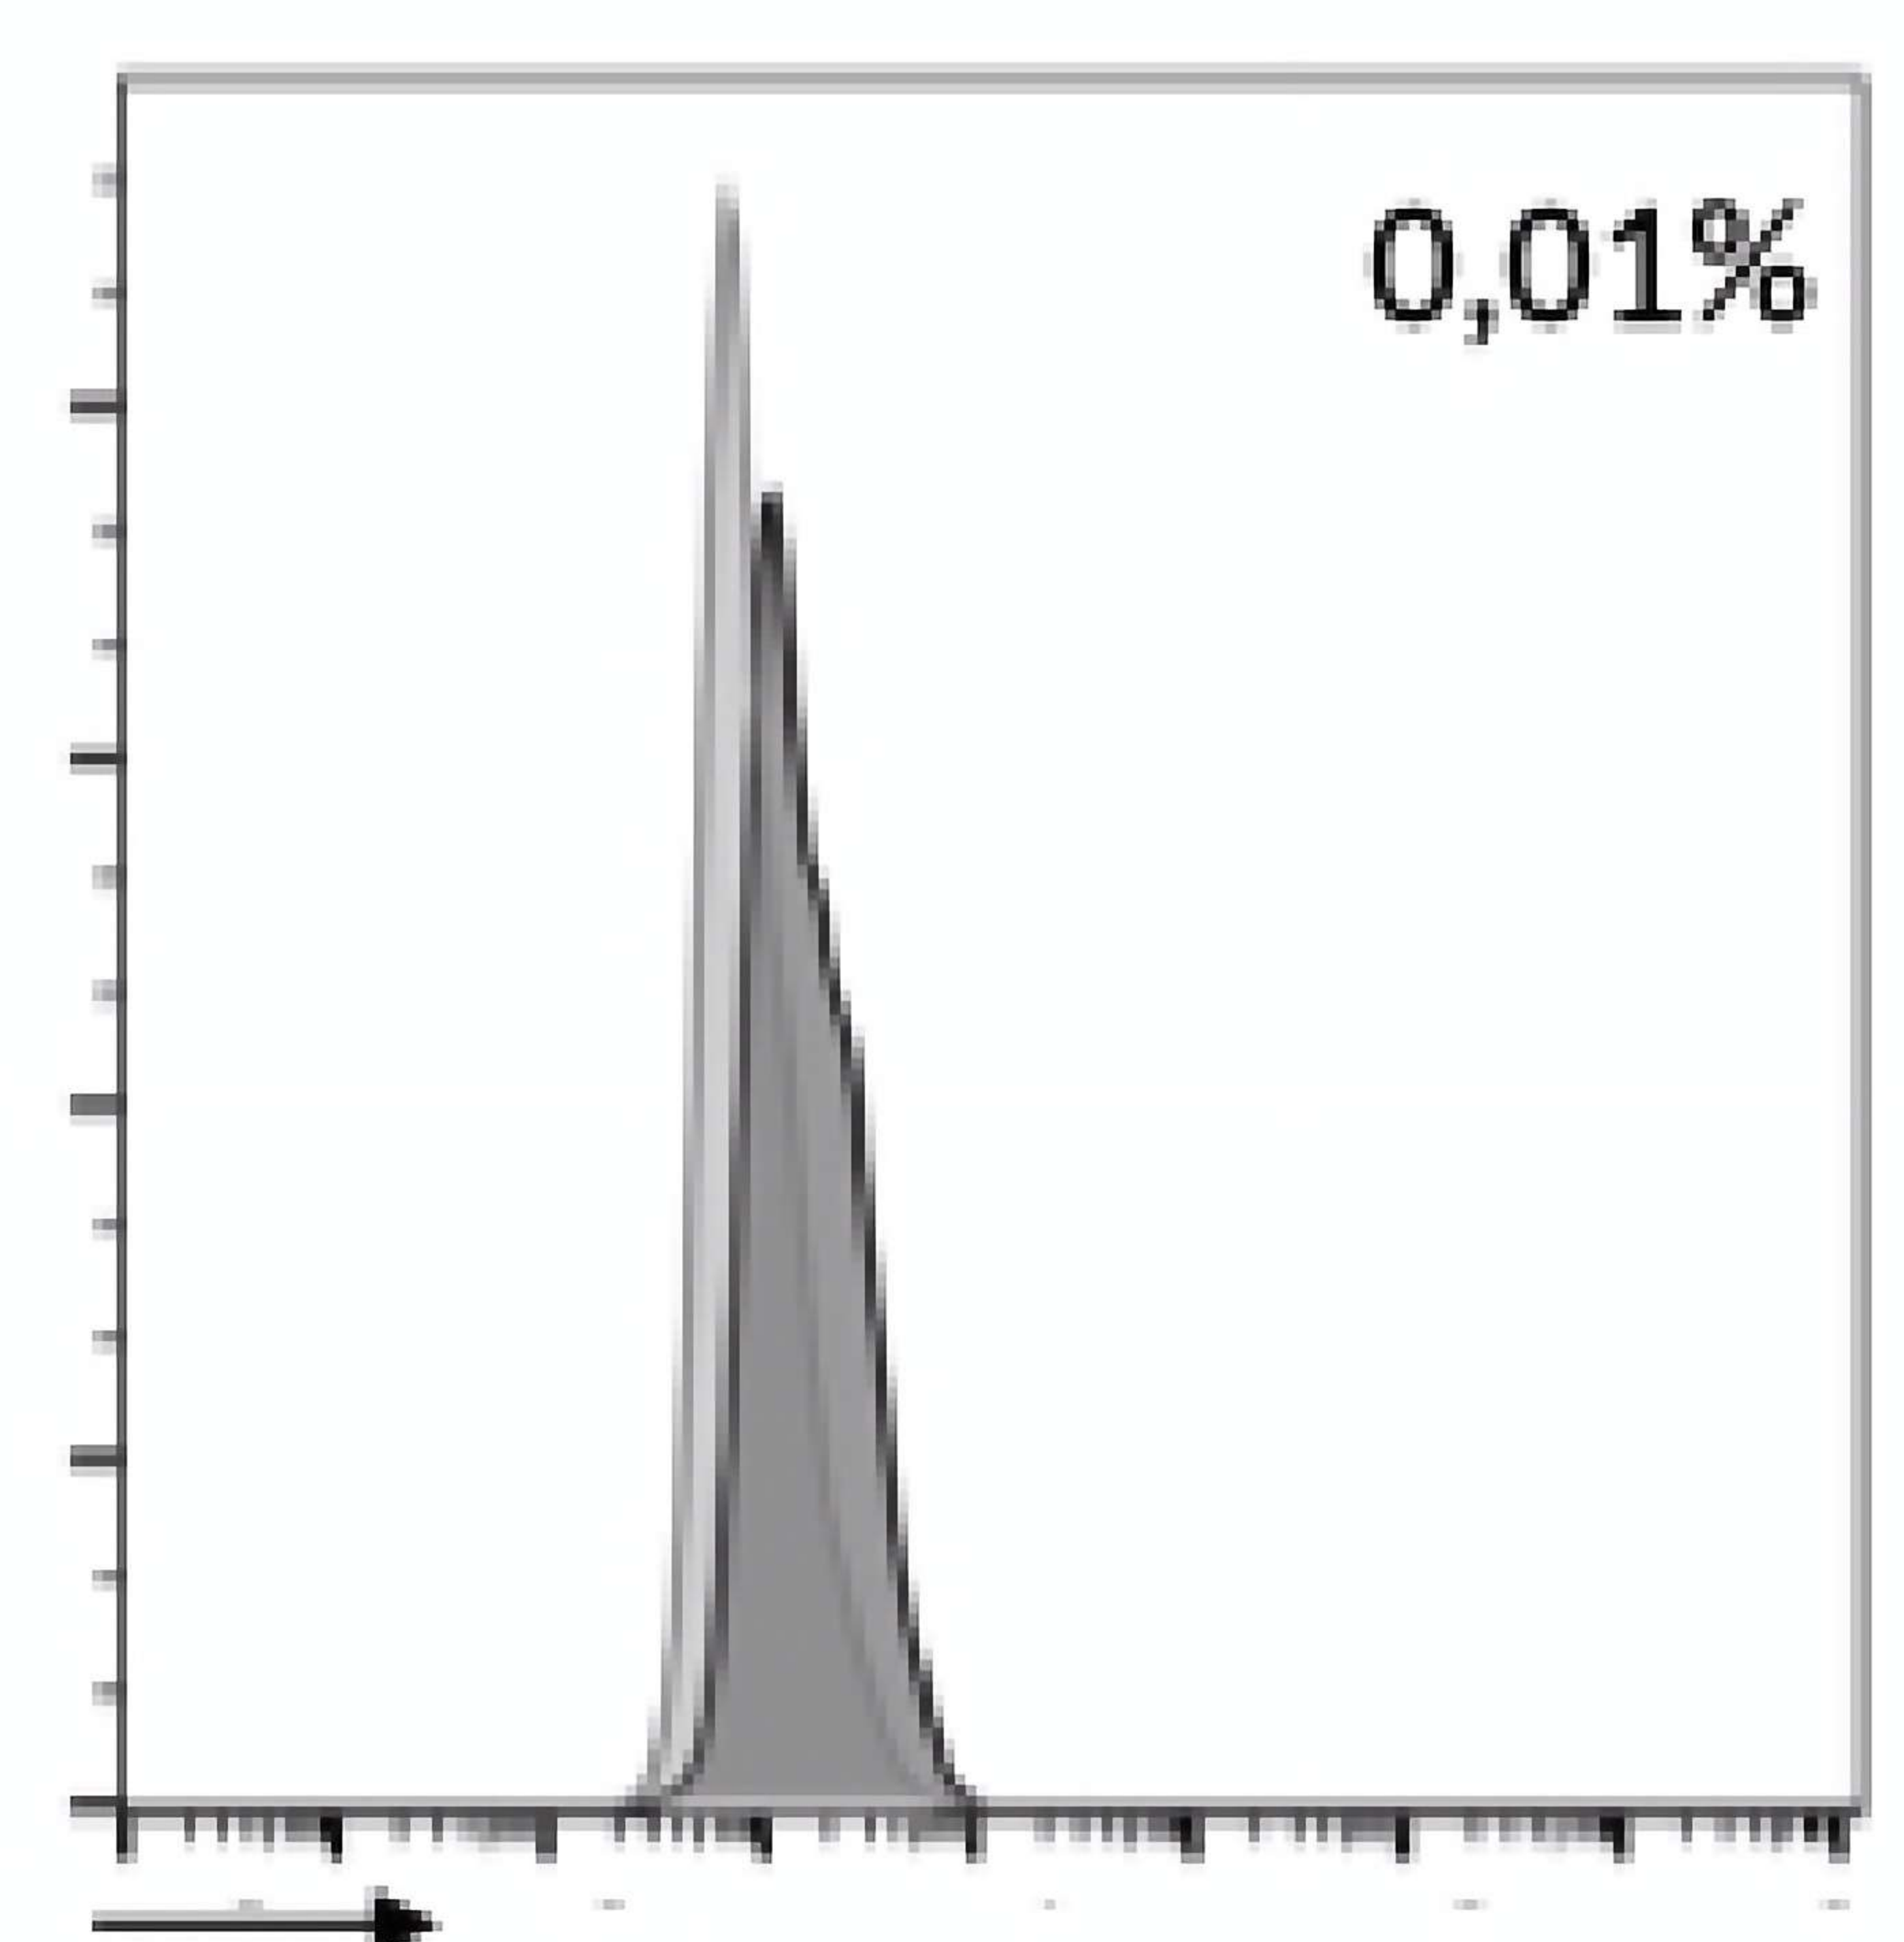

Supplement: s1 [file s1]
